# Supplementary material
Source: publisher site journal article supplement (https://www.spandidos-publications.com/2963/downloadSupplementary)

Figure S1. Confirmation of validity of STIM1 and Orai1 overexpression vector. (A) A representative image of western blot analysis performed for the analysis (B) of the expression of STIM1 in lung cancer A549 cells transfected with or without STIM1 overexpression vector. (C) A representative image of western blot performed for the analysis (B) of the expression of Orai1 in lung cancer A549 cells transfected with or without Orai1 overexpression vector.  $\beta$ -actin was used as loading control. Values are shown as the mean  $\pm$  standard deviation.  $n=3$ . \* $P<0.05$  vs. control group. STIM, stromal interaction molecule; Orai, calcium release-activated calcium channel protein.

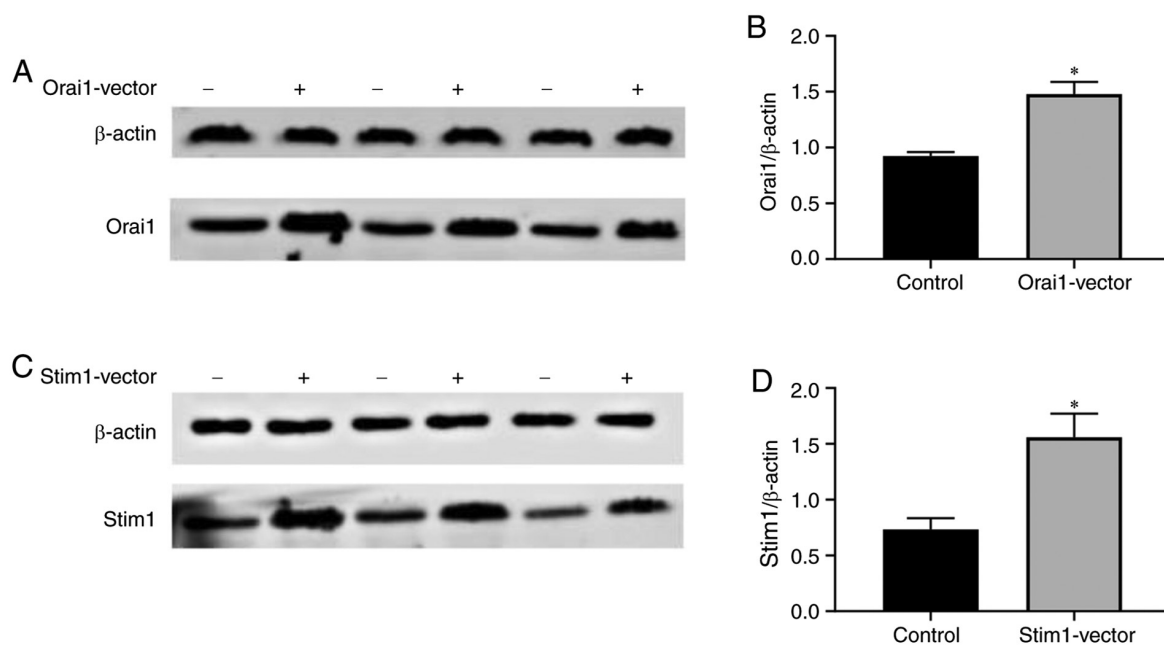

Supplement: Supplementary file 1 [file downloadSupplementary]
